# Supplementary material for: Learning-by-Teaching Approach Improves Dengue Knowledge in Children and Parents
Source: PubMed Central journal article supplement (PMC8641307; doi:10.4269/ajtmh.21-0253), 2021-09-07
Supplement: tpmd210253.SD1.pdf [file tpmd210253.SD1.pdf]

## Supplemental Material

### Learning-by-teaching approach improves dengue knowledge in children and parents

**Studies 1 and 2: Participants. Sample size calculation.** For sample size calculation in Study 1, given the heterogeneity in cross-age tutoring studies' effect sizes,<sup>1</sup> we used the lowest ( $d = .38$ ) and the highest ( $d = .80$ ) reported effect sizes to derive a range of sample sizes required to achieve a power level of at least .80. The sample sizes required were  $n=540$  and  $n=120$ , respectively. We aimed at recruiting the highest required sample size and therefore invited 4<sup>th</sup> grade children in all the sub-urban, low socioeconomic status schools in the city (potentially reaching 600 children). However, only 155 children participated in the study (the others did not sign their consents or were absent during the time in which activities were carried out in schools). For Study 2 we calculated the minimum sample size required for an anticipated effect size of .15, a statistical power level of .80, four factors and a probability level of .05 (see <sup>2</sup>). The minimum sample size required is 84.

**Study 1: Data analysis.** To test our hypotheses, we used a Linear Mixed Model with a baseline covariate since this statistical approach (aside from accounting for inter-subject variability via random effects factors) has the advantage of being able to deal with unbalanced data (which is the case in this study).

Following descriptive data exploration, we assumed normality of standardized residuals, homogeneity of variance between groups and normal distribution of random effects.

Although our statistical approach was mainly hypothesis-driven, we performed likelihood ratio tests between nested models including (or not) interaction terms and nuisance-variables (school ID, True-False test version, etc.) to select the best model (i.e., highest likelihood with the smaller number of parameters).

Model diagnostics (residual plots and Shapiro Wilks and Levene tests) after estimation of the selected model, showed that LMM assumptions were not violated, thus providing credibility to model inference.

To validate the selected model, we visually inspected residuals (to check for obvious departures from randomness) and computed the  $R^2$  of the relation between observed data and model predictions as a measure of goodness of fit. We then performed Tukey HSD posthoc tests (adjusted for multiple comparisons) over the estimated marginal means differences to address our hypotheses (i.e., differences for each time and group). Degrees of freedom were computed with the Kenward-Rogers' approximation for LMM.

We used specific R packages for each part of the analysis pipeline: tidyr<sup>3</sup> and dplyr<sup>4</sup> for data manipulation; lme4<sup>5</sup> for linear mixed model estimation, car<sup>6</sup> for ANOVA, emmeans<sup>7</sup> for post-hoc hypothesis testing, flextable<sup>8</sup> for table output, and ggplot2<sup>9</sup> for plotting.

The final Linear mixed model formulae and specifications for Study 1 is the following:

Random Intercepts Linear Mixed Model (LMM1):

$$Y_{ij} = \beta_0 + \beta_1 * BL_{ij} + \beta_2 * T_{2ij} + \beta_3 * T_{3ij} + \\ \beta_4 * G_{2ij} + \beta_5 * G_{3ij} + \beta_6 * G_{4ij} + \\ \beta_7 * BL_{ij} * T_{2ij} + \beta_8 * BL_{ij} * T_{3ij} + \\ \beta_9 * G_{2ij} * T_{2ij} + \beta_{10} * G_{3ij} * T_{2ij} + \\ \beta_{11} * G_{4ij} * T_{2ij} + \beta_{12} * G_{2ij} * T_{3ij} + \beta_{13} * G_{3ij} * T_{3ij} + \beta_{14} * G_{4ij} * T_{3ij} \\ + \alpha_j + \epsilon_{ij}$$

Y : Dependent variable (Score).

BL: Baseline co-variate.

T<sub>2,3</sub>: Dummy-coded variables for Time 2 and 3.

G<sub>2,3,4</sub>: Dummy-coded variables for Groups

-G<sub>2</sub>: Booklet,

-G<sub>3</sub>: Tutoring,

-G<sub>4</sub>: Tutoring with booklet.

Note: T<sub>1</sub> and G<sub>1</sub> (Control) are the reference levels for T<sub>2,3</sub> and G<sub>2,3,4</sub>, respectively.

$\alpha_j \sim N(0, \sigma_c^2)$ ,  $\sigma_c^2$ : cases variance.

$\epsilon_{ij} \sim N(0, \sigma_r^2)$ ,  $\sigma_r^2$ : residuals variance.

i: 1-3 observations per case.

j: 1-155 cases.

### **Study 1: Results details.**

Regarding model fitting information, the estimates for each level are in Table SM2, the intraclass correlation coefficient is in Table SM3, and the likelihood ratio test is in Table SM4. The final model's  $R^2 = .799$ , indicating an adequate fit (i.e. the model fairly reproduces the observed data). Although baseline variability

was integrated into our model, we ran a separate analysis on baseline values only and found no differences between groups (Table SM5). Results of comparisons within groups are in Table SM6.

### **Study 1: comparisons within groups interpretation**

Regarding how meaningful these within-groups differences are, between T2 and T3, only the B group decreased significantly (the others decreased but in a non-statistically significant amount). However, TB group decreased less than the others. The decrease in TB group was half of the decrease in C and T, and one third of B group. Differences between half a point and one and a half points are comparable to the ones that have been reported in other dengue educational interventions analyzing within differences. For example, AhbiRami and Zuharah <sup>10</sup> carried out an intervention in secondary schools to increase knowledge about dengue, and found significant differences between the pre and post-test within groups in 1 or 2 items (according to the participant's residence area). Also, in T3, only the TB group showed a level of knowledge similar to the reached after the talk (T1), suggesting that teaching parents with a booklet is meaningful to maintain knowledge in the long term, maybe working as a protection against the of lost dengue concepts acquired in the talk due to time.

### **Study 2: Data analysis.**

We ran models in R (version using the same functions and packages as in Study 1).

Model selection, diagnostics and validation and hypothesis testing was performed in the same way as for Study 1 (except here there was not a random-effects factor). The final model is the following:

Linear Model (LM2):

$$Y_i = \beta_0 + \beta_1 * BL_i + \beta_2 * G_{2i} + \beta_3 * G_{3i} + \beta_4 * G_{4i} + \epsilon_i$$

Y : Dependent variable (post score).

BL: Baseline co-variate.

G<sub>2,3,4</sub>: Dummy-coded variables for Groups

-G<sub>2</sub>: Tutoring,

-G<sub>3</sub>: Tutoring with Booklet,

-G<sub>4</sub>: Expert.

Note: G<sub>1</sub> (Unrelated Topic) is the reference level for G<sub>2,3,4</sub>.

$\epsilon_i \sim N(0, \sigma_r^2)$ ,  $\sigma_r^2$ : residuals variance.

i: 1-96 cases.

**Study 2: LM2 results details.** Means and dispersions for each time and group are in Table SM7. Regarding model fitting information, the estimates for each level are in Table SM8. The final model's  $R^2 = .320$ , indicating an adequate fit (Table SM9). No differences between groups were found in baseline (Table SM10).

**Study 2: Linear model including mention (LM2m) results details.**

Descriptive statistic of mention and post score, in T and TB groups is in Table SM11. Model estimation is in Table SM12 and fitting information and other data are in Table SM13. The final model's  $R^2 = .170$ .

## SM Tables

Table SM1. True-False Items in Test (Version A), and Correct Answer for Each Item

| True-False item                                                                                                                                    | Correct answer |
|----------------------------------------------------------------------------------------------------------------------------------------------------|----------------|
| There is more dengue in the jungle than in the city                                                                                                | F              |
| Dengue is transmitted from human to human                                                                                                          | F              |
| The Aedes aegypti mosquito leaves its eggs in streams                                                                                              | F              |
| Dengue, Zika, Yellow fever and Chikungunya fever are transmitted by all mosquitoes, infected or uninfected ones                                    | F              |
| Dengue is a disease that is never fatal                                                                                                            | F              |
| If you feel a fever or headache and think you may have dengue, you have to take an aspirin, it is not necessary to go to the doctor                | F              |
| The mosquito that transmits dengue, in general, bites at noon                                                                                      | F              |
| If you feel a fever or headache, you have to stop drinking water                                                                                   | F              |
| The mosquito, since it becomes an adult, can live for 4 to 8 weeks                                                                                 | T              |
| Only the female mosquito transmits dengue                                                                                                          | T              |
| In order to avoid mosquitoes, you have to throw containers that collect stagnant water                                                             | T              |
| Symptoms appear 4 to 7 days after the mosquito bites you                                                                                           | T              |
| First, the mosquito is larva and lives in the water for about 7 days                                                                               | T              |
| The mosquito is found in dark places inside homes                                                                                                  | T              |
| Aedes aegypti is black and has white spots and stripes on the body and legs                                                                        | T              |
| If we have a container that collects stagnant water and we cannot throw away, we must cover it so that it does not become a mosquito breeding site | T              |
| After a rainy day, you have to remove the containers that contain water to prevent the mosquito from growing                                       | T              |
| For the mosquito does not bite you, you have to wear short-sleeved clothes                                                                         | F              |
| The mosquito bites more frequently on the face and back, than on the legs and arms                                                                 | F              |
| The use of repellents can help avoid the mosquito bites you                                                                                        | T              |
| In order to avoid mosquitoes you have to keep the house tidy and clean                                                                             | T              |
| Dengue causes fever and body aches                                                                                                                 | T              |

Table SM2. Study 1: LMM1 Coefficients Estimates

| Coefficient                | Estimate | SE   | df      | t value | Pr(> t ) | 2.5%   | 97.5%  |
|----------------------------|----------|------|---------|---------|----------|--------|--------|
| Intercept                  | 9.366    | .807 | 253.164 | 11.603  | .000     | 7.810  | 10.922 |
| Baseline                   | .540     | .061 | 257.965 | 8.784   | .000     | .422   | .659   |
| T2                         | .457     | .836 | 222.469 | .547    | .585     | -1.150 | 2.066  |
| T3                         | -.183    | .900 | 226.403 | -.203   | .839     | -1.916 | 1.549  |
| Booklet                    | .080     | .674 | 238.050 | .119    | .905     | -1.222 | 1.378  |
| Tutoring                   | .687     | .730 | 253.181 | .941    | .348     | -.722  | 2.094  |
| Tutoring with Booklet      | 1.220    | .754 | 236.733 | 1.619   | .107     | -.234  | 2.674  |
| Baseline : T2              | -.103    | .061 | 214.705 | -1.682  | .094     | -.220  | .015   |
| Baseline : T3              | -.135    | .065 | 223.919 | -2.074  | .039     | -.261  | -.010  |
| T2 : Booklet               | 1.290    | .700 | 216.707 | 1.843   | .067     | -.057  | 2.636  |
| T3 : Booklet               | .588     | .738 | 221.331 | .798    | .426     | -.832  | 2.007  |
| T2 : Tutoring              | .282     | .755 | 219.834 | .373    | .709     | -1.171 | 1.736  |
| T3 : Tutoring              | .168     | .788 | 223.419 | .213    | .832     | -1.348 | 1.684  |
| T2 : Tutoring with Booklet | .979     | .770 | 216.412 | 1.271   | .205     | -.503  | 2.460  |
| T3 : Tutoring with Booklet | 1.306    | .882 | 224.272 | 1.481   | .140     | -.390  | 3.003  |

Table SM3. Study 1: LMM1 Intra-class Correlation Coefficient

|          | Variance | ICC  |
|----------|----------|------|
| Case     | 4.616    | .538 |
| Residual | 3.957    |      |

Table SM4. Study 1: Nested LMM Likelihood Ratio Test (Tests Random Effects Factor “Relevance/Significance”)

| Df     | Log Likelihood | Df | Chi squared | Pr(>Chi squared) |
|--------|----------------|----|-------------|------------------|
| 16.000 | -881.084       |    |             |                  |
| 17.000 | -843.602       | 1  | 74.965      | .000             |

Table SM5. Study 1: ANOVA Between Groups in Baseline

| Contrast (df=138)                | Estimate | SE    | Lower CL | Upper CL | T ratio | p value |
|----------------------------------|----------|-------|----------|----------|---------|---------|
| Booklet - Control                | 1.418    | .961  | -1.082   | 3.917    | 1.475   | .456    |
| Tutoring - Control               | 1.523    | 1.014 | -1.115   | 4.16     | 1.501   | .44     |
| Tutoring - Booklet               | .105     | .997  | -2.488   | 2.698    | .105    | 1.000   |
| Tutoring with Booklet - Control  | -1.228   | 1.082 | -4.042   | 1.587    | -1.135  | .669    |
| Tutoring with Booklet - Booklet  | -2.646   | 1.066 | -5.419   | .128     | -2.481  | .067    |
| Tutoring with Booklet - Tutoring | -2.751   | 1.114 | -5.648   | .147     | -2.468  | .069    |

Table SM6. Study 1: Linear Mixed Model. Comparisons Within Groups

| Contrast | Group                 | Estimate | SE   | df      | Lower CL | Upper CL | T ratio | p value |
|----------|-----------------------|----------|------|---------|----------|----------|---------|---------|
| T2 - T1  | Control               | -.657    | .535 | 226.361 | -1.918   | .604     | -1.229  | .437    |
| T3 - T1  | Control               | -1.652   | .565 | 226.357 | -2.984   | -.320    | -2.927  | .011    |
| T3 - T2  | Control               | -.995    | .620 | 235.882 | -2.459   | .468     | -1.604  | .246    |
| T2 - T1  | Booklet               | .633     | .449 | 208.201 | -.428    | 1.693    | 1.408   | .339    |
| T3 - T1  | Booklet               | -1.064   | .475 | 218.584 | -2.184   | .057     | -2.241  | .067    |
| T3 - T2  | Booklet               | -1.696   | .475 | 218.557 | -2.816   | -.576    | -3.574  | .001    |
| T2 - T1  | Tutoring              | -.375    | .533 | 216.931 | -1.633   | .884     | -.703   | .762    |
| T3 - T1  | Tutoring              | -1.485   | .550 | 223.453 | -2.783   | -.186    | -2.698  | .020    |
| T3 - T2  | Tutoring              | -1.110   | .516 | 213.854 | -2.327   | .108     | -2.151  | .082    |
| T2 - T1  | Tutoring with Booklet | .322     | .558 | 209.033 | -.996    | 1.640    | .576    | .833    |
| T3 - T1  | Tutoring with Booklet | -.346    | .679 | 224.823 | -1.949   | 1.257    | -.510   | .867    |
| T3 - T2  | Tutoring with Booklet | -.668    | .673 | 223.223 | -2.257   | .921     | -.992   | .583    |

Table SM7. Study 2: Linear Model. Means and Dispersions for each Time and Group

| Group                 | n  | Baseline |      | Post score |      |
|-----------------------|----|----------|------|------------|------|
|                       |    | Mean     | SD   | Mean       | SD   |
| Unrelated Topic       | 20 | 16.45    | 3.27 | 17.15      | 2.89 |
| Tutoring              | 30 | 17.20    | 3.31 | 18.87      | 1.96 |
| Tutoring with Booklet | 27 | 16.52    | 3.62 | 19.11      | 2.06 |
| Expert                | 20 | 16.45    | 2.24 | 19.70      | 1.78 |

**Table SM8. Study 2: LM2 Estimates by Each Level of Independent Variable**

| Coefficients          | Estimate | SE    | t value | Pr(> t ) | 2.5%  | 97.5%  |
|-----------------------|----------|-------|---------|----------|-------|--------|
| Intercept             | 12.061   | 1.125 | 10.721  | .000     | 9.826 | 14.295 |
| Baseline              | .309     | .063  | 4.907   | .000     | .184  | .435   |
| Tutoring              | 1.485    | .565  | 2.630   | .010     | .363  | 2.606  |
| Tutoring with Booklet | 1.940    | .575  | 3.374   | .001     | .798  | 3.082  |
| Expert                | 2.550    | .616  | 4.138   | .000     | 1.326 | 3.774  |

Table SM9. Study 2: LM2 Fitting Information

| R squared | Adjusted. r squared | Sigma | Statistic | p value | df | Log Likelihood | AIC     | BIC     | Deviance | df residual |
|-----------|---------------------|-------|-----------|---------|----|----------------|---------|---------|----------|-------------|
| .320      | .291                | 1.949 | 10.836    | .000    | 5  | -199.795       | 411.589 | 427.037 | 349.432  | 92          |

Table SM10. Study 2: Results of ANOVA (Baseline by Group)

| Factor    | Sum of Squares | df | F value | Pr(>F) |
|-----------|----------------|----|---------|--------|
| Baseline  | 91.451         | 1  | 24.078  | .000   |
| Group     | 72.222         | 3  | 6.338   | .001   |
| Residuals | 349.432        | 92 |         |        |

Table SM11. Study 2: Descriptive Statistics of Mention and Post Score (Groups T and TB)

| Group                 | Mean mention | SD mention | Post Score |       | n  |
|-----------------------|--------------|------------|------------|-------|----|
|                       |              |            | Mean       | SD    |    |
| Tutoring              | 9.643        | 3.664      | 18.821     | 2.019 | 28 |
| Tutoring with Booklet | 10.680       | 3.739      | 19.240     | 2.047 | 25 |

Table SM12. Study 2: LM2m Coefficient Estimation

| Coefficients | Estimate | SE    | t value | Pr(> t ) | 2.5%   | 97.5%  |
|--------------|----------|-------|---------|----------|--------|--------|
| (Intercept)  | 14.116   | 1.608 | 8.781   | .000     | 10.887 | 17.345 |
| Baseline     | .191     | .080  | 2.387   | .021     | .030   | .352   |
| Mention      | .163     | .071  | 2.313   | .025     | .022   | .305   |

Table SM13. Study 2: LM2m Fitting Information

| R squared | Adjusted r squared | Sigma | Statistic | p value | df | Log likelihood | AIC     | BIC     | Deviance | Df residual |
|-----------|--------------------|-------|-----------|---------|----|----------------|---------|---------|----------|-------------|
| .170      | .137               | 1.88  | 5.117     | .010    | 3  | -107.128       | 222.257 | 230.138 | 176.795  | 50          |

## Supplemental Material References

1. Roscoe RD, Chi MT, 2007. Understanding tutor learning: Knowledge-building and knowledge-telling in peer tutors' explanations and questions *Rev Educ Res* 77: 534-574.
2. Cohen J, Cohen P, West SG, Aiken LS, 2003. Applied Multiple Regression/Correlation Analysis for the Behavioral Sciences (3rd edition), Mahwah: USA: Lawrence Earlbaum Associates.
3. Wickham H, Henry L, 2019. tidy: Tidy Messy Data. R package version 1.0.0. Available at: <https://CRAN.R-project.org/package=tidy>. Accessed December 10, 2020.
4. Wickham H, François R, Henry L, Müller K; 2019. A grammar of data manipulation. R package version 0.8.3. Available at: <https://CRAN.R-project.org/package=dplyr> Accessed December 10, 2020.
5. Bates D, Mächler M, Bolker B, Walker S, 2014. Fitting linear mixed-effects models using lme4 *arXiv preprint: arXiv: 1406.5823*.
6. Fox J, Weisberg S, 2019. An {R} Companion to Applied Regression, Third Edition. California, USA: Sage.
7. Lenth R, 2019. emmeans: estimated marginal means, aka least-squares means. R package v. 1.3. 4. Available at: <https://CRAN.R-project.org/package=emmeans>. Accessed December 10, 2020.
8. Gohel D, 2019. flextable: Functions for Tabular Reporting. R package version 0.5.5. Available at: <https://CRAN.R-project.org/package=flextable>. Accessed December 10, 2020.
9. Wickham H, 2016. ggplot2: Elegant Graphics for Data Analysis. New York, USA: Springer-Verlag.
10. AhbiRami R, Zuharah WF, 2020. School-based health education for dengue control in Kelantan, Malaysia: Impact on knowledge, attitude and practice *PLoS Negl Trop Dis* 14: e0008075.
